# Supplementary material for: Hierarchical S-doped porous carbon derived from by-product lignin for high-performance supercapacitors
Source: Royal Society of Chemistry journal article supplement (doi:10.1039/c7ra00767a), 2017-01-01
Supplement: c7ra00767a1.pdf [file c7ra00767a1.pdf]

1     **Hierarchical S-doped Porous Carbon Derived from By-products**

2                     **Lignin for High-Performance Supercapacitors**

3     Jingyang Tian, Zhangming Liu, Zhenghui Li, Wenguang Wang, Haiyang Zhang\*

4     College of Materials and Energy, Guangdong University of Technology, Guangzhou

5     51006, China

6

7

8

9

10

11

12

13

14

15

16

17

18

19

20

21

22

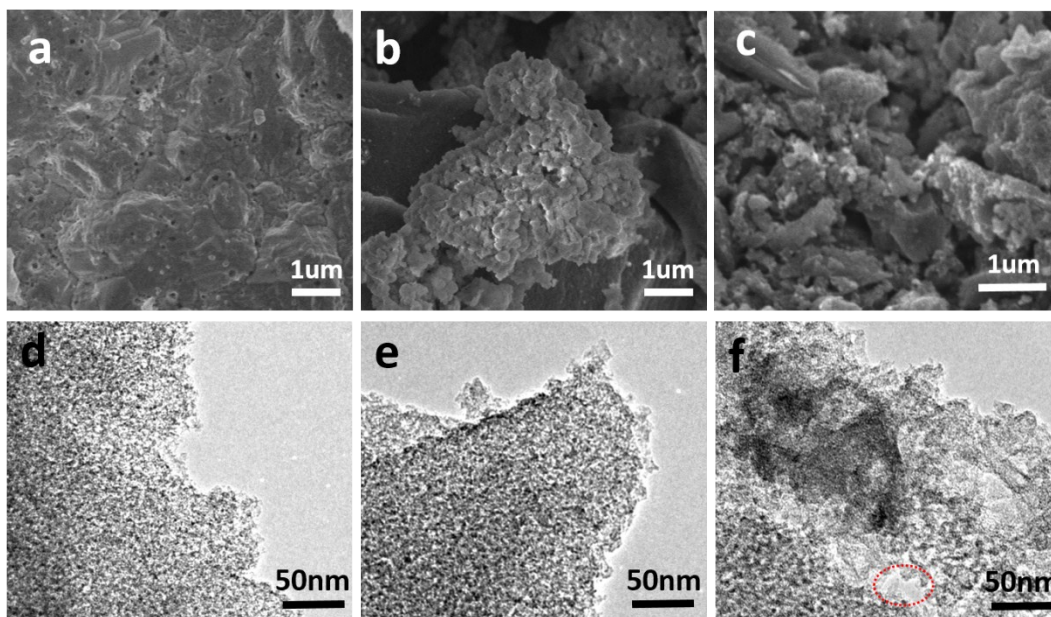

23

24 Figure S1. (a) FE-SEM image of PC-S-900. (b) FE-SEM image of S-PC-L-700. (c) FE-SEM image of S-PC-L-800

25 (d) FE-TEM image of PC-S-900. (e) FE-TEM image of S-PC-L-700. (f) FE-TEM image of S-PC-L-800.

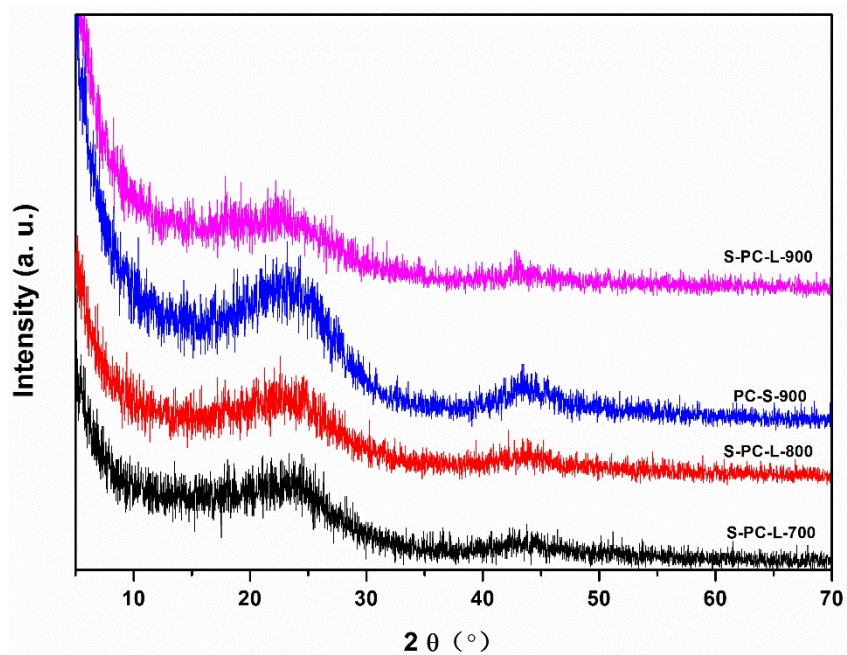

26

27

Figure S2. XRD patterns of samples.

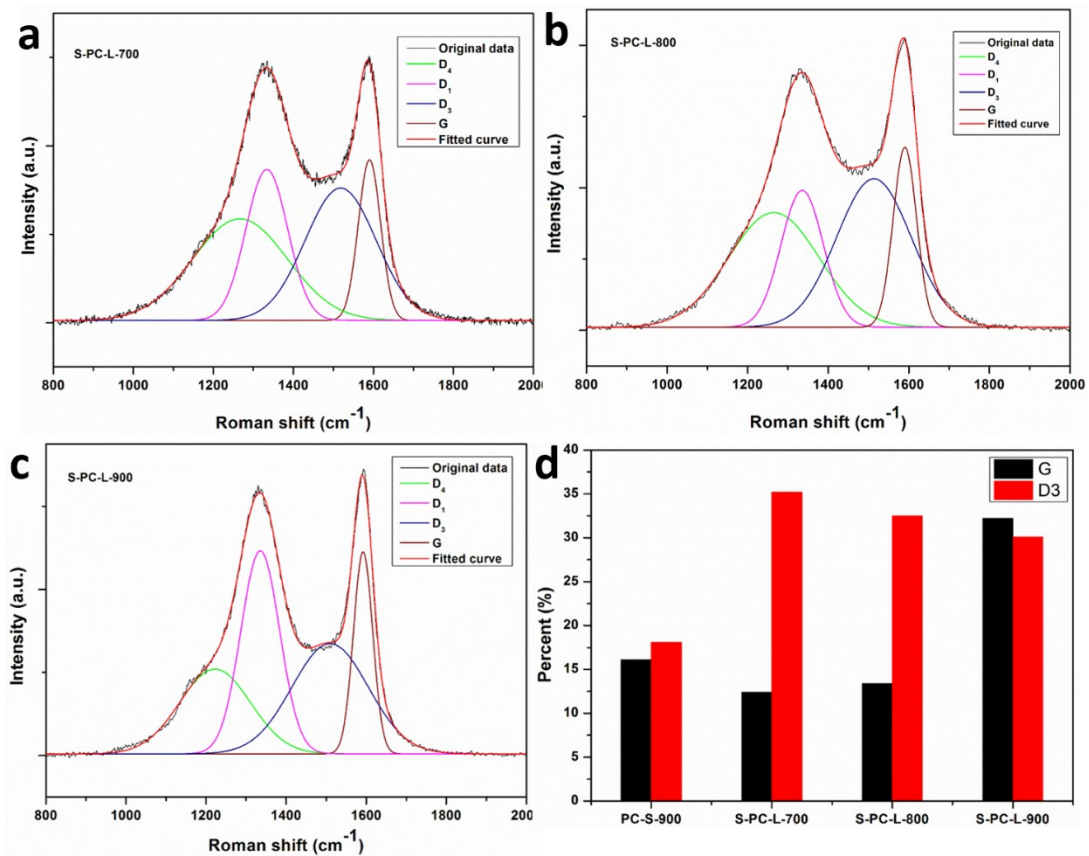

28

29 Figure S3. (a) Raman spectra of (a) S-PC-L-700, (b) S-PC-L-800, (c) S-PC-L-900, and (d) percent of amorphous  
 30 and ideal graphitic carbon.

31

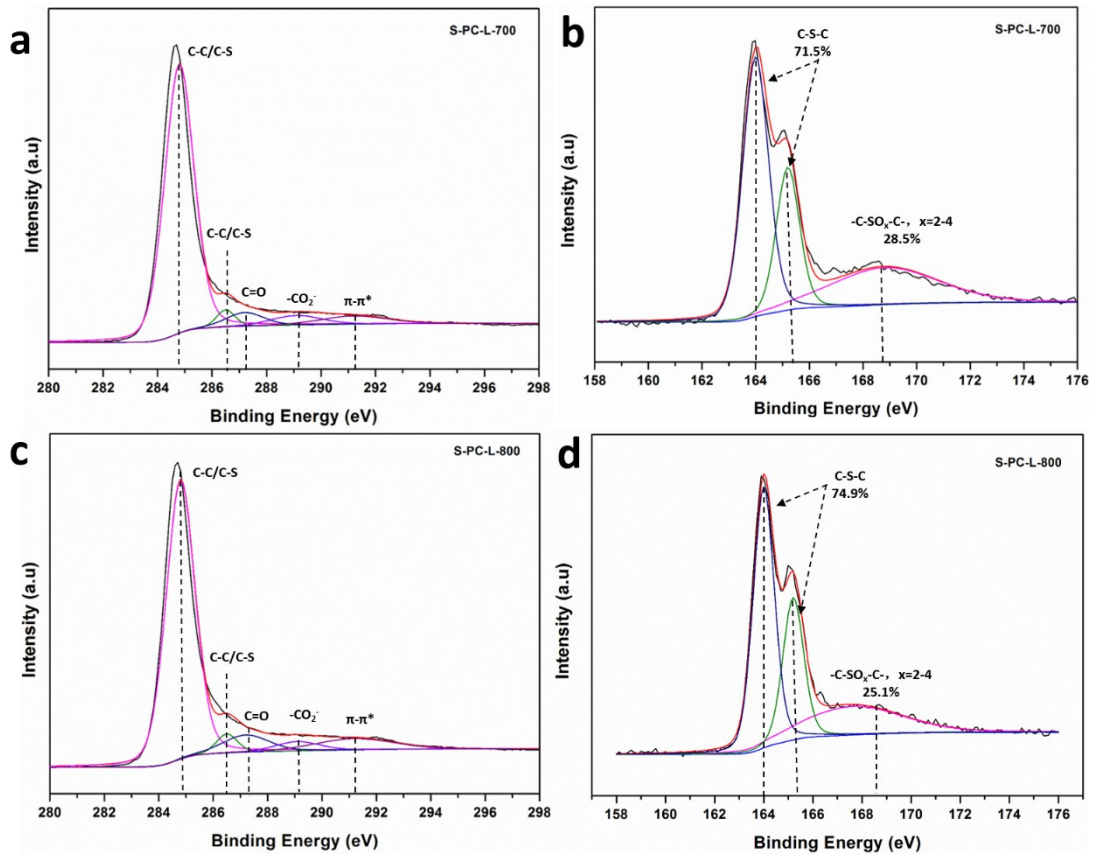

32  
 33 Figure S4. (a) High resolution XPS spectra of C 1s (a) and S 2p (b) of S-PC-L-700, C 1s (c) and S 2p (d) of S-PC-  
 34 L-800.

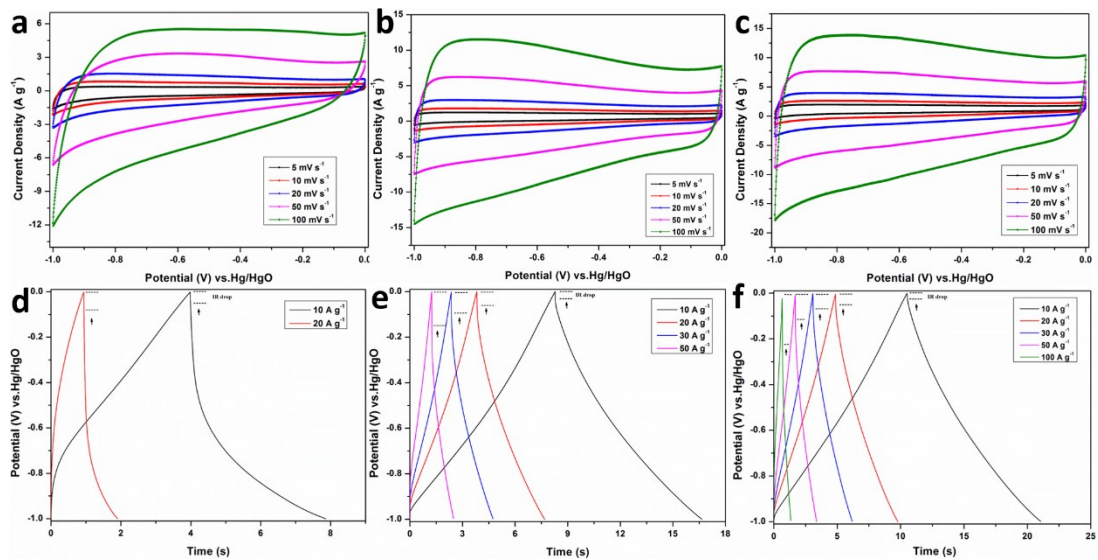

35  
 36 Figure S5. The CV curves of the (a) S-PC-L-700, (b) S-PC-L-800 and (c) PC-S-900 at various scan rates. The  
 37 galvanostatic charge-discharge curves of (d) S-PC-L-700, (e) S-PC-L-800 and (f) PC-S-900 at various current  
 38 densities.

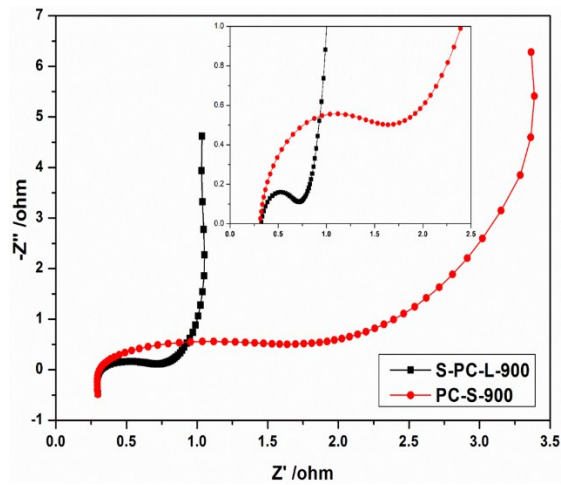

39

40

Figure S6. Nyquist plots of PC-S-900 and S-PC-L-900.

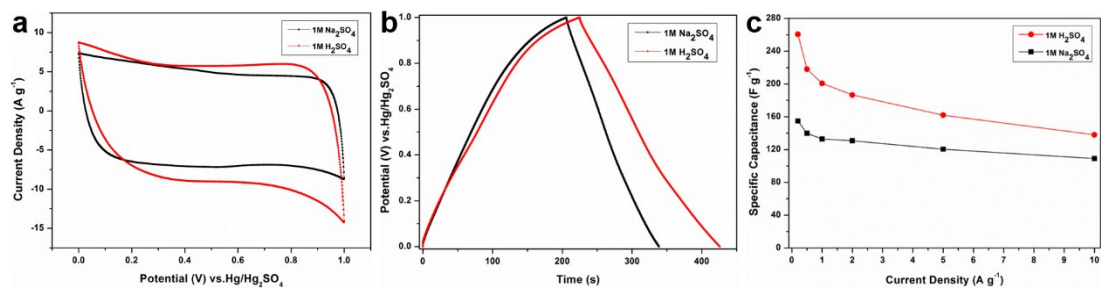

41

42 Figure S7. Electrochemical performance of the S-PC-L-900 in 1 M H<sub>2</sub>SO<sub>4</sub> and Na<sub>2</sub>SO<sub>4</sub> aqueous electrolyte in a

43 three-electrode system. (a) CV curves at 50 mV s<sup>-1</sup>, (b) galvanostatic charge-discharge curves at 1 A g<sup>-1</sup>, (c)

44 specific capacitance at various current densities.

45

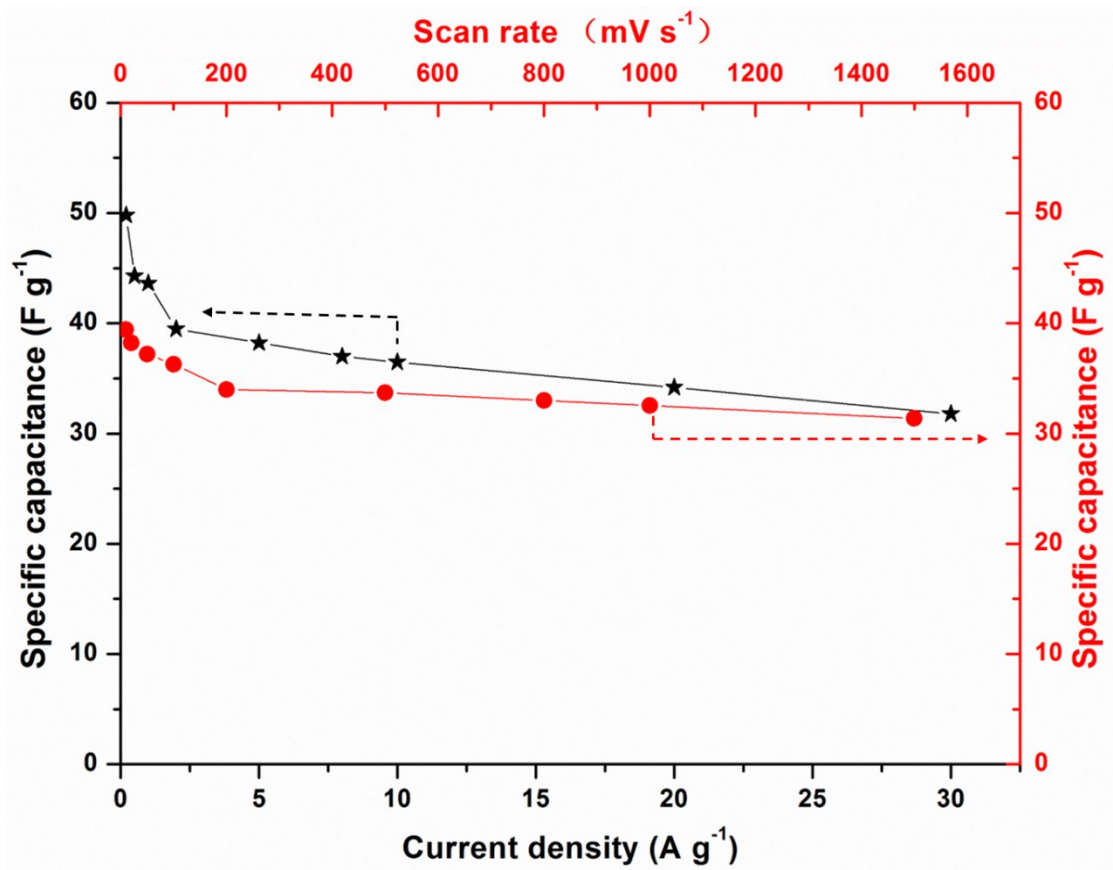

46

47

Figure S8. Specific capacitance of S-PC-L-900 symmetric supercapacitor calculated from cyclic voltammetry

48

curves and GCD curves.
